# Supplementary material
Source: PubMed Central journal article supplement (PMC5407945)
Supplement: NIHMS848105-supplement-1.pdf [file NIHMS848105-supplement-1.pdf]

## **Supplementary Information**

### **Incubation of 2-Methylisoborneol Synthase with the Intermediate Analogue 2-Methylneryl Diphosphate**

Wayne K. W. Chou,<sup>1</sup> Colin A. Gould<sup>1</sup> and David E. Cane<sup>1</sup>

<sup>1</sup>Department of Chemistry, Box H, Brown University, Providence, Rhode Island 02912-9108

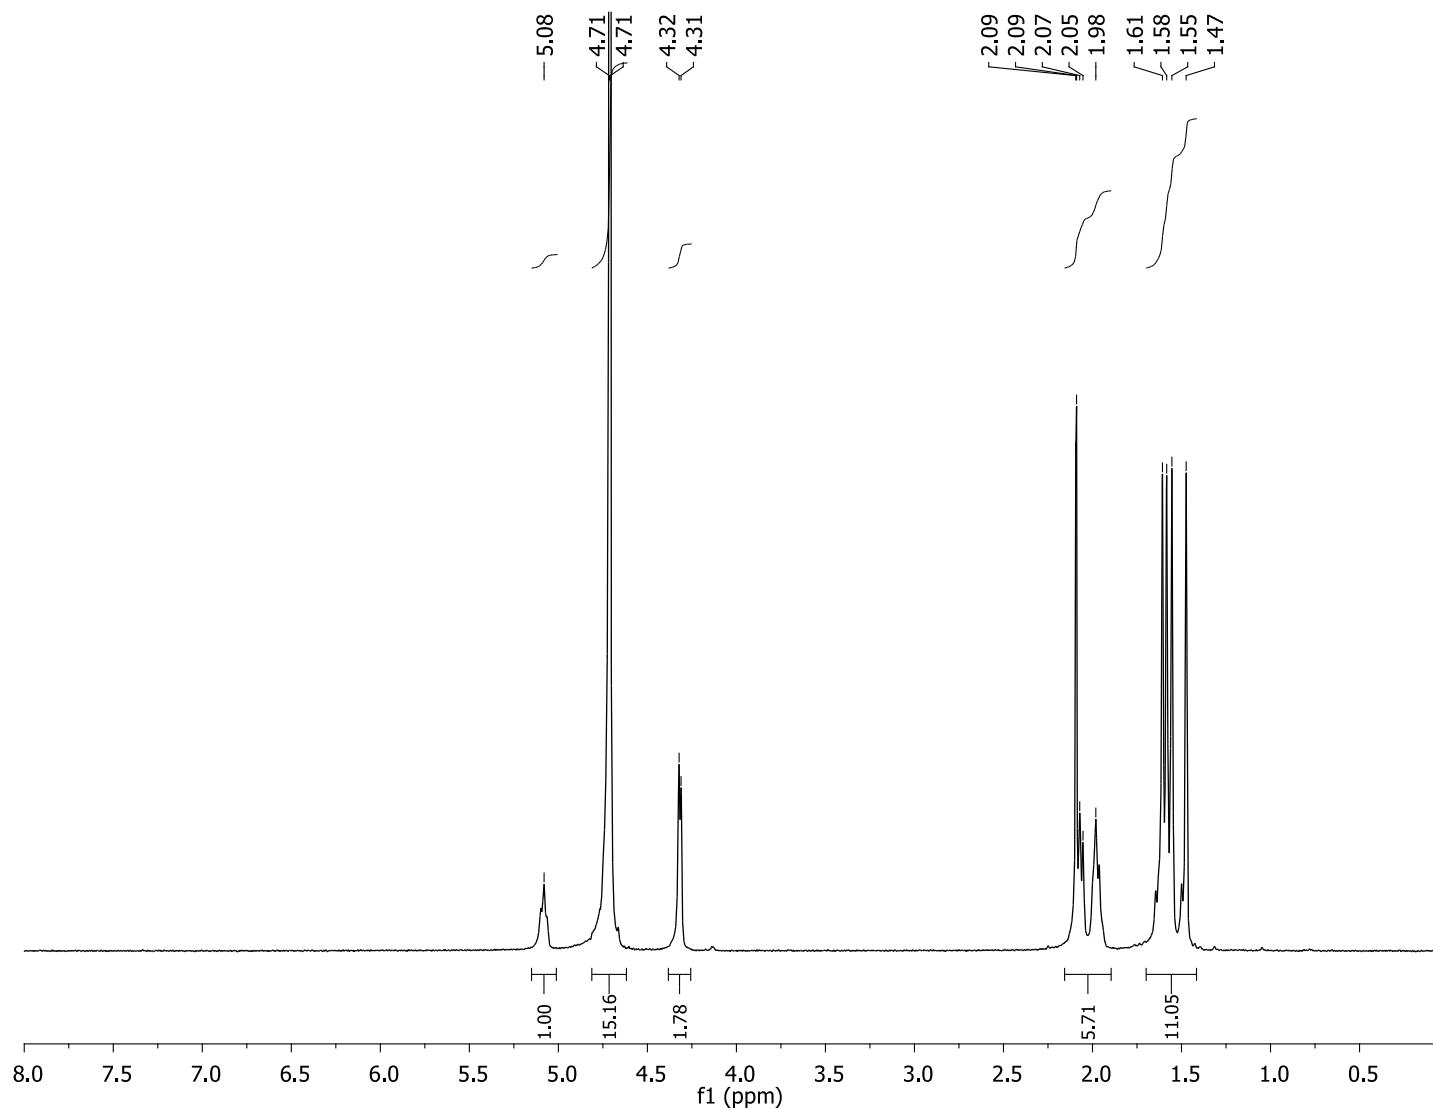

**Figure S1.**  $^1\text{H}$  NMR spectrum (400 MHz,  $\text{D}_2\text{O}$ ) of 2-MeNPP (**10**).

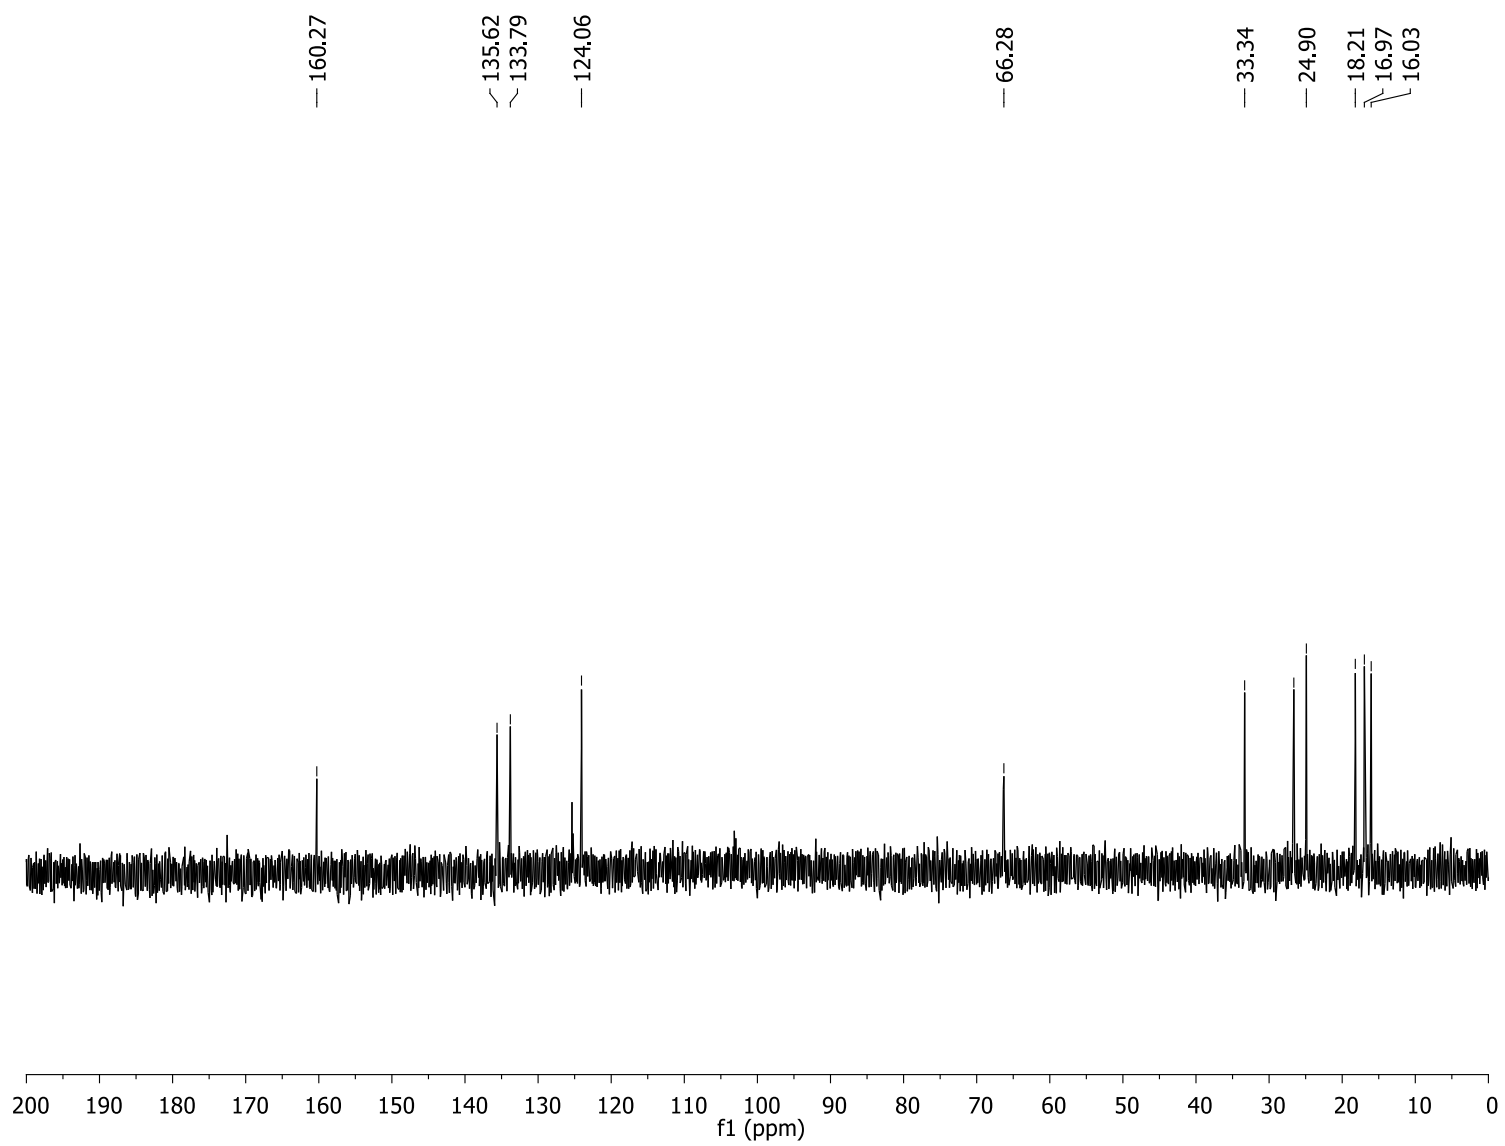

**Figure S2.**  $^{13}\text{C}$   $\{^1\text{H}\}$  NMR spectrum (75 MHz,  $\text{D}_2\text{O}$ ) of 2-MeNPP (**10**).

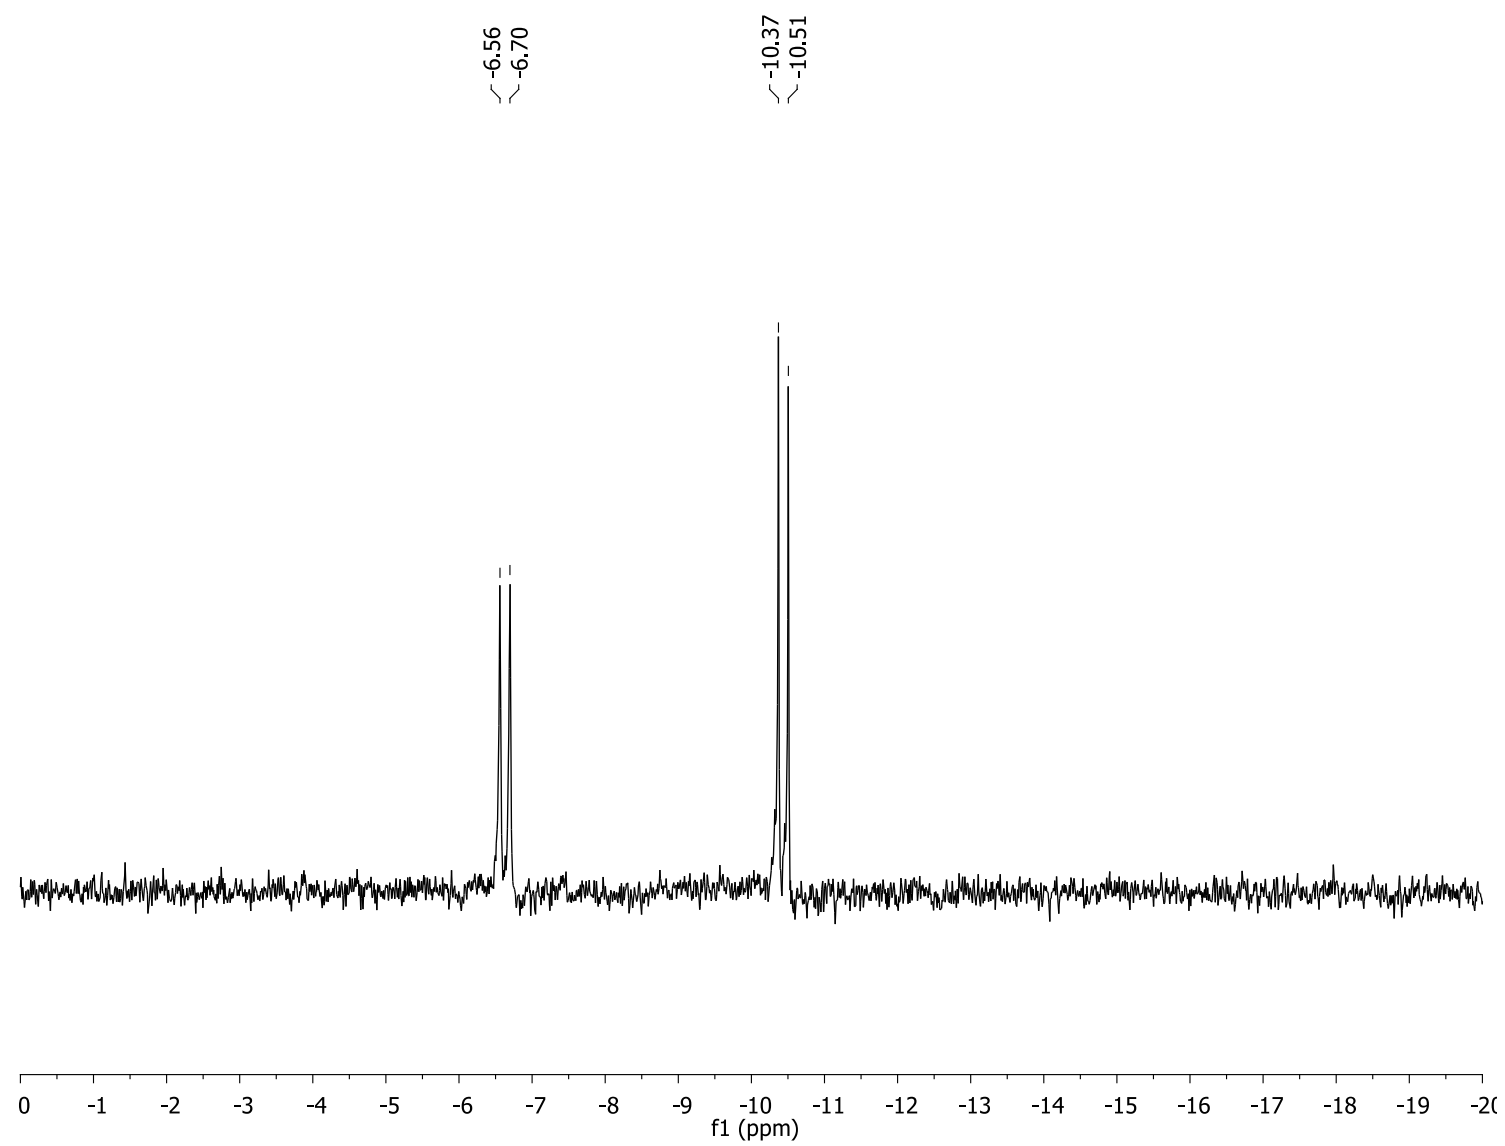

**Figure S3.**  $^{31}\text{P}$   $\{^1\text{H}\}$  NMR spectrum (161 MHz,  $\text{D}_2\text{O}$ ) of 2-MeNPP (**10**).

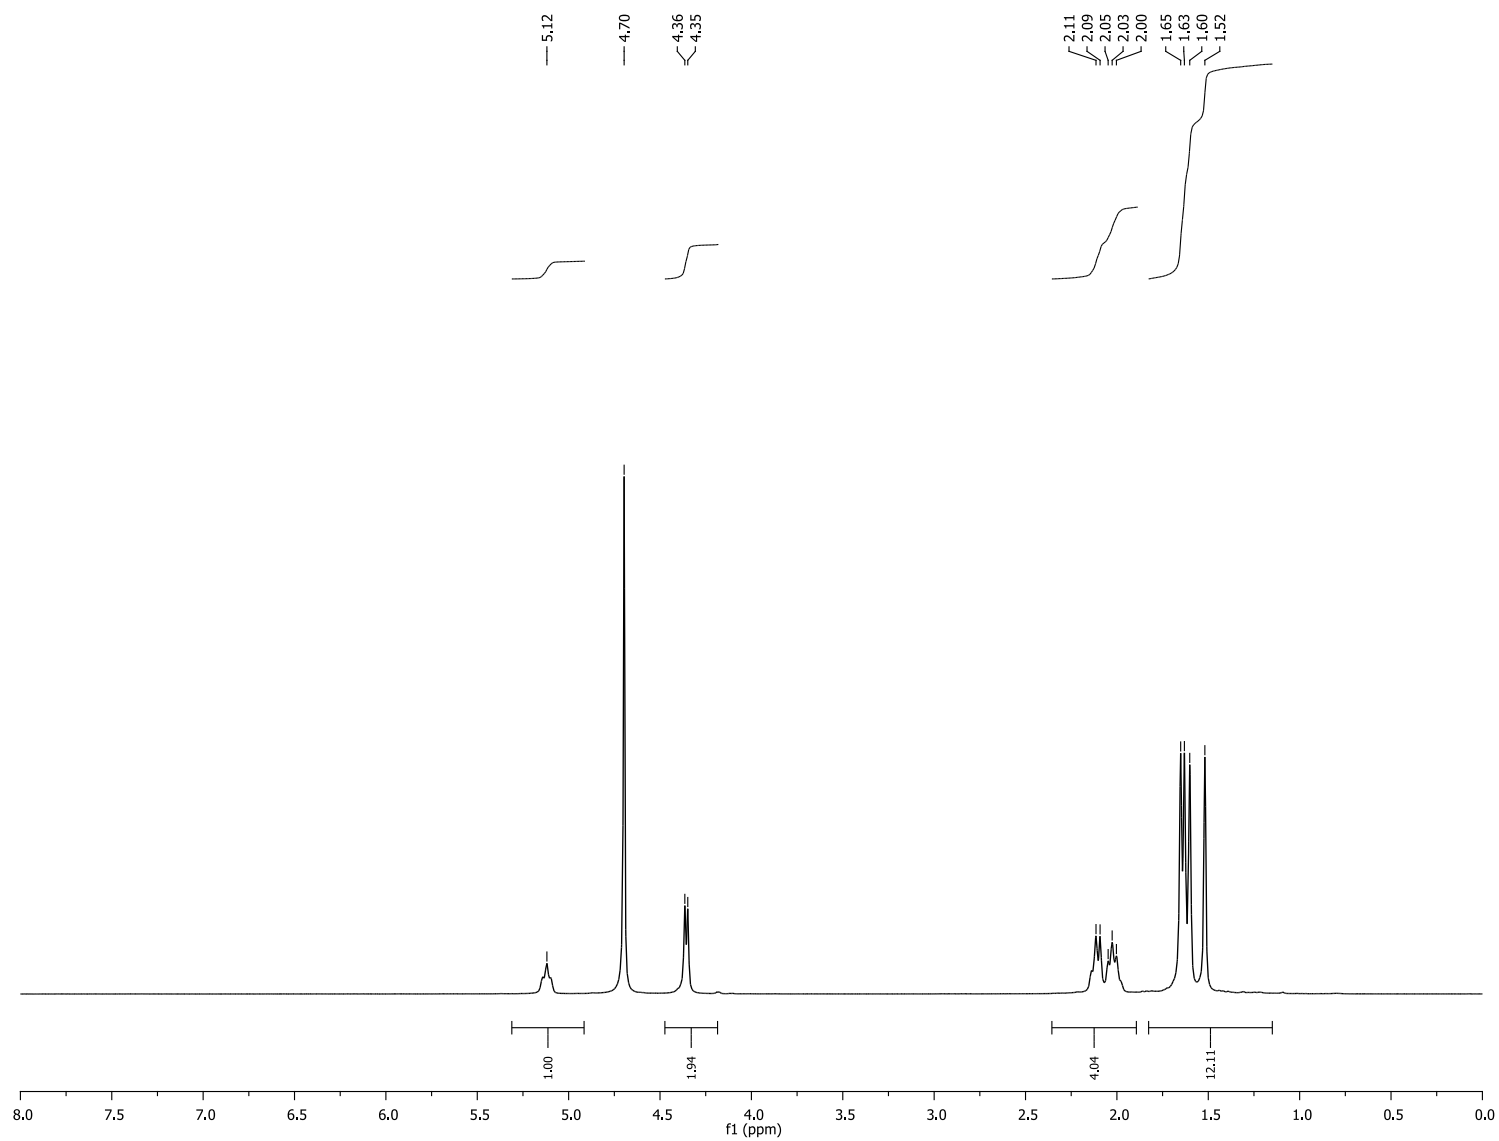

**Figure S4.** <sup>1</sup>H NMR spectrum (300 MHz, D<sub>2</sub>O) of [1-<sup>3</sup>H]-2-MeNPP (**10**).

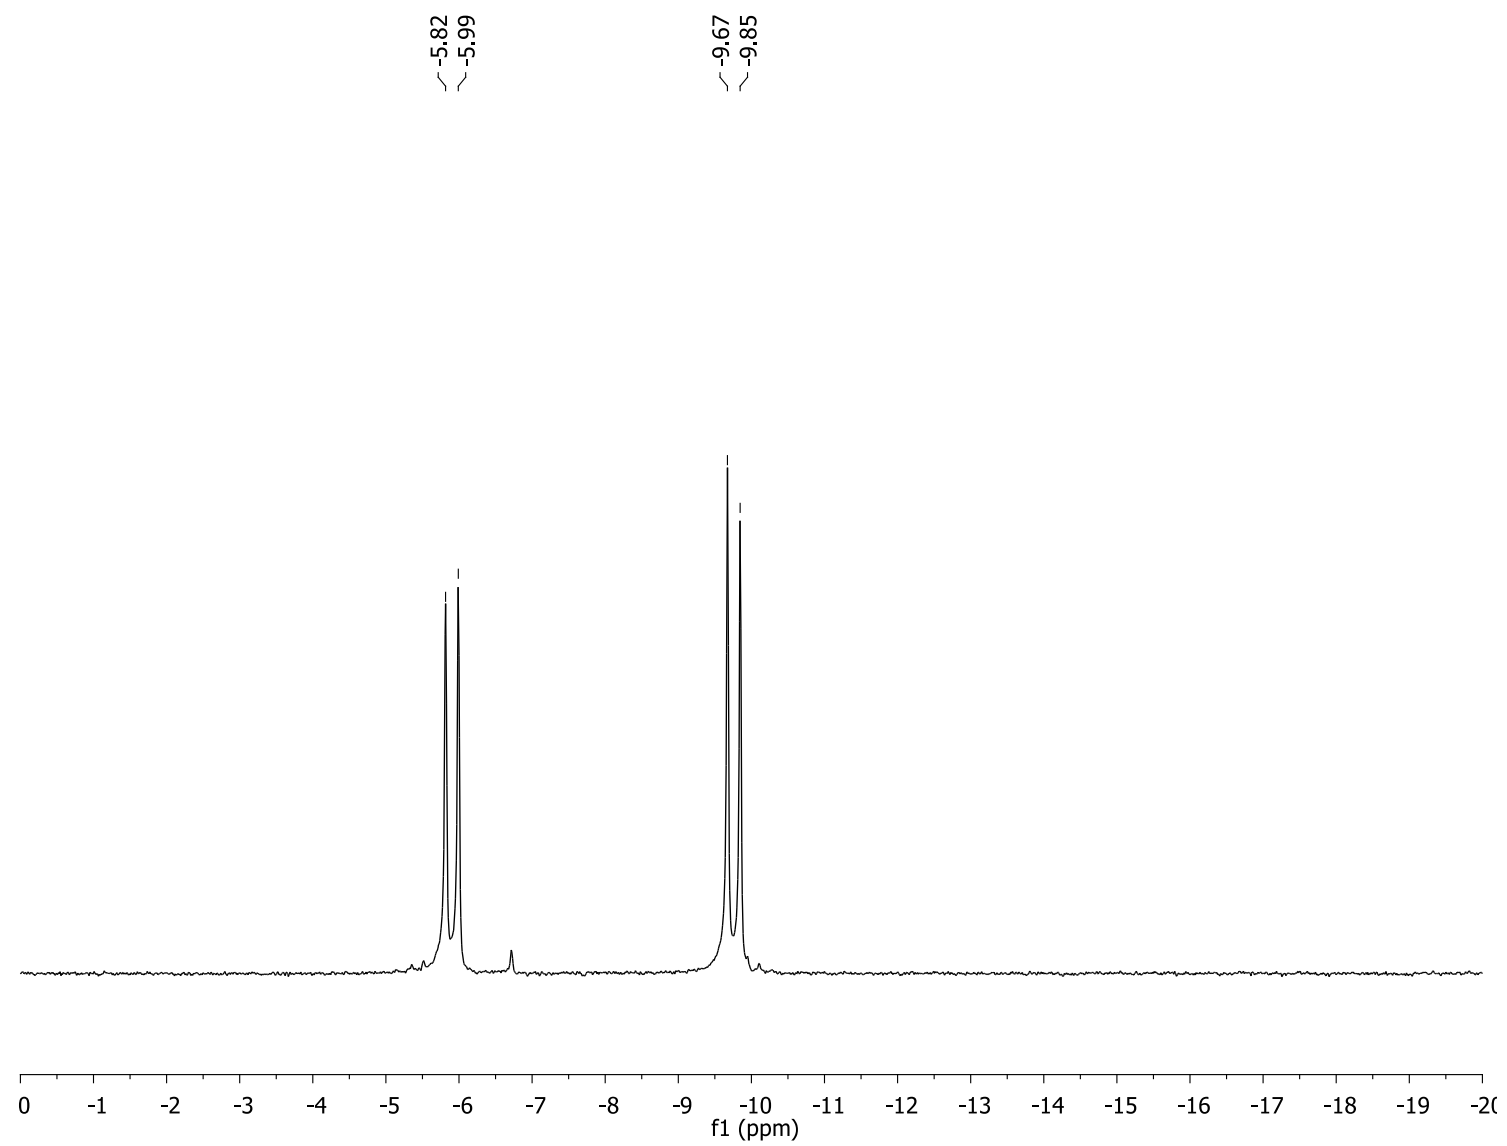

**Figure S5.**  $^{31}\text{P}$   $\{^1\text{H}\}$  NMR spectrum (121 MHz,  $\text{D}_2\text{O}$ ) of  $[1\text{-}^3\text{H}]\text{-2-MeNPP}$  (**10**).

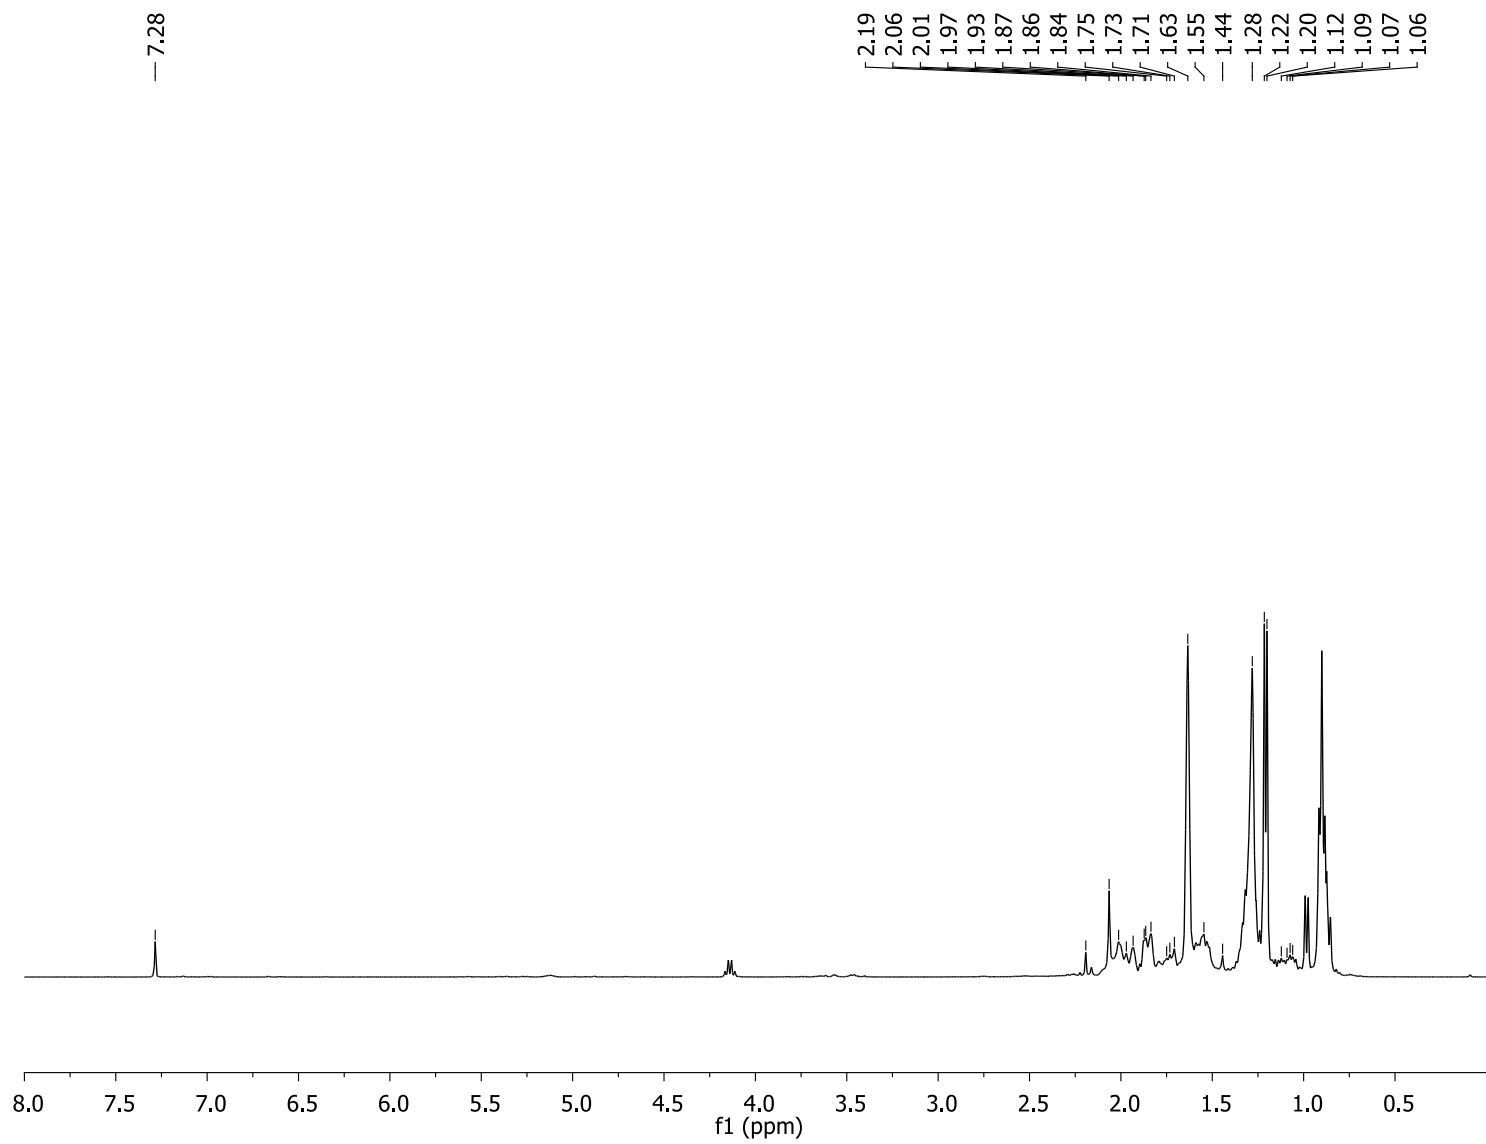

**Figure S6.**  $^1\text{H}$  NMR spectrum (400 MHz,  $\text{CDCl}_3$ ) of 2-methyl- $\alpha$ -terpineol (**13**).

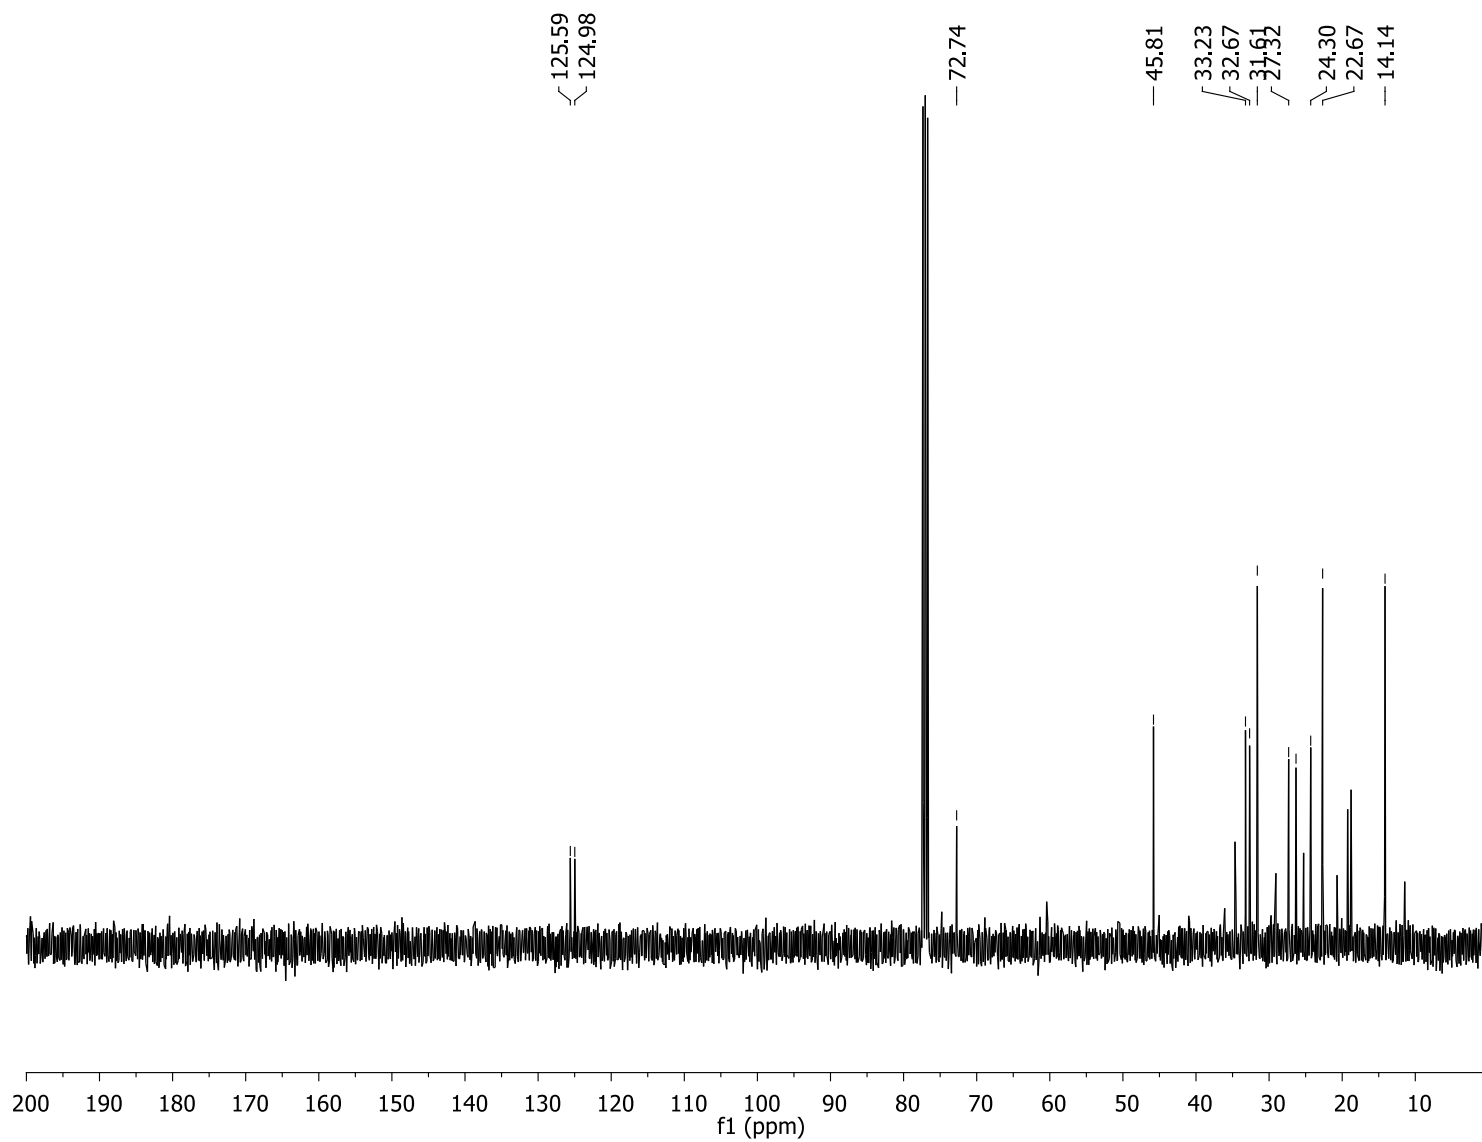

**Figure S7.**  $^{13}\text{C}$   $\{^1\text{H}\}$  NMR spectrum (100 MHz,  $\text{CDCl}_3$ ) of 2-methyl- $\alpha$ -terpineol (**13**).



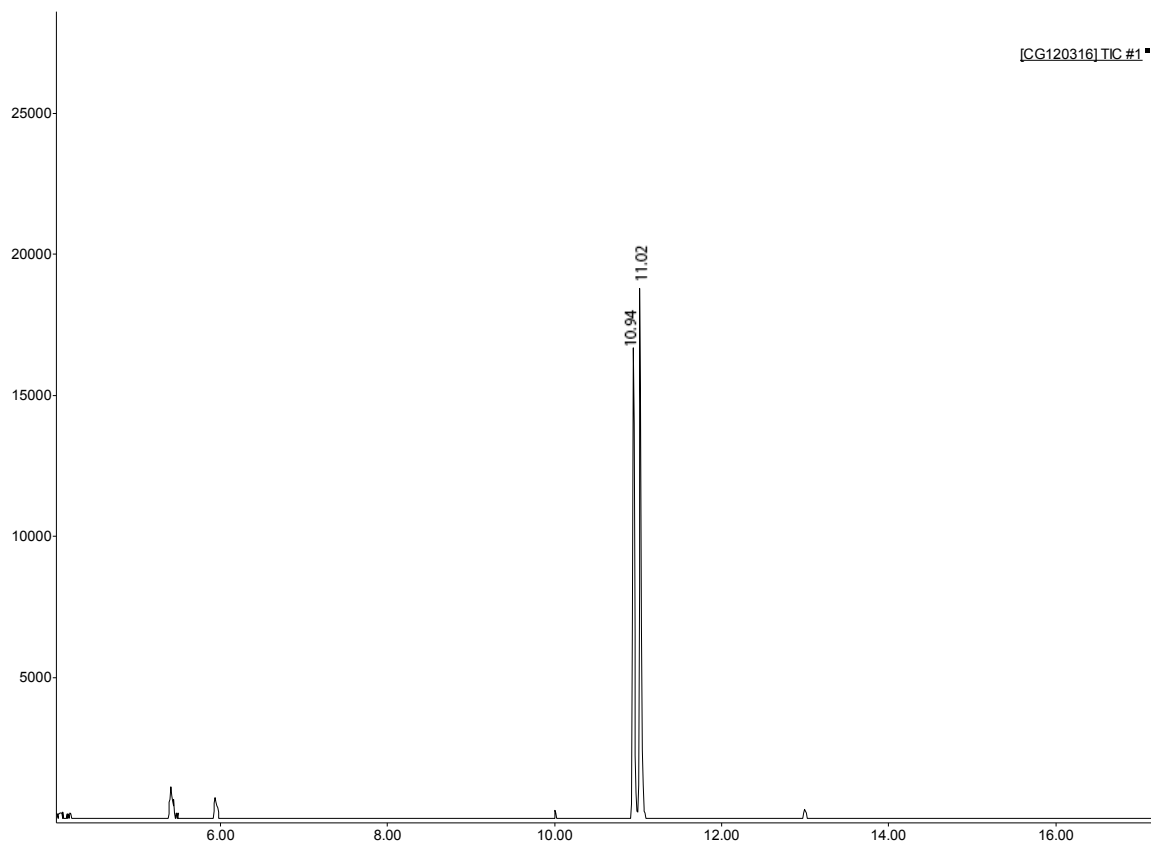

**Figure S8.** Chiral GC-MS TIC of synthetic racemic 2-methyl- $\alpha$ -terpineol (**13**), showing individual enantiomers at ret. time 10.94 and 11.02 min.

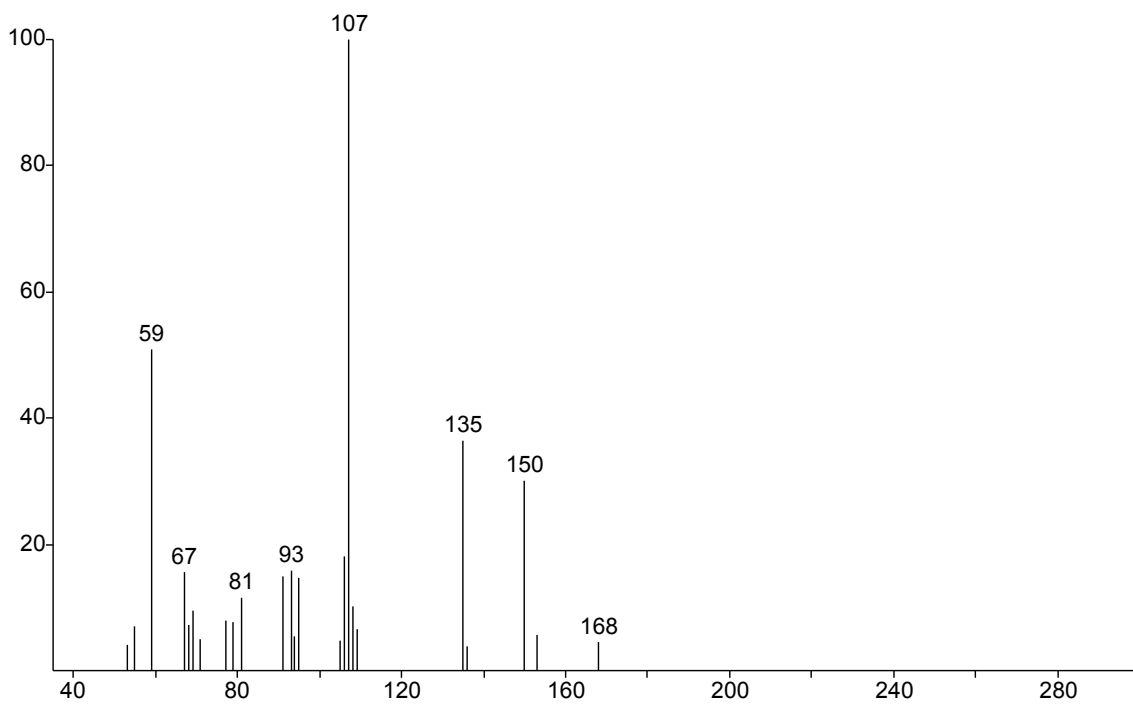

**Figure S9.** Mass spectrum of 2-methyl- $\alpha$ -terpineol (**13**) peak at 10.94 min.

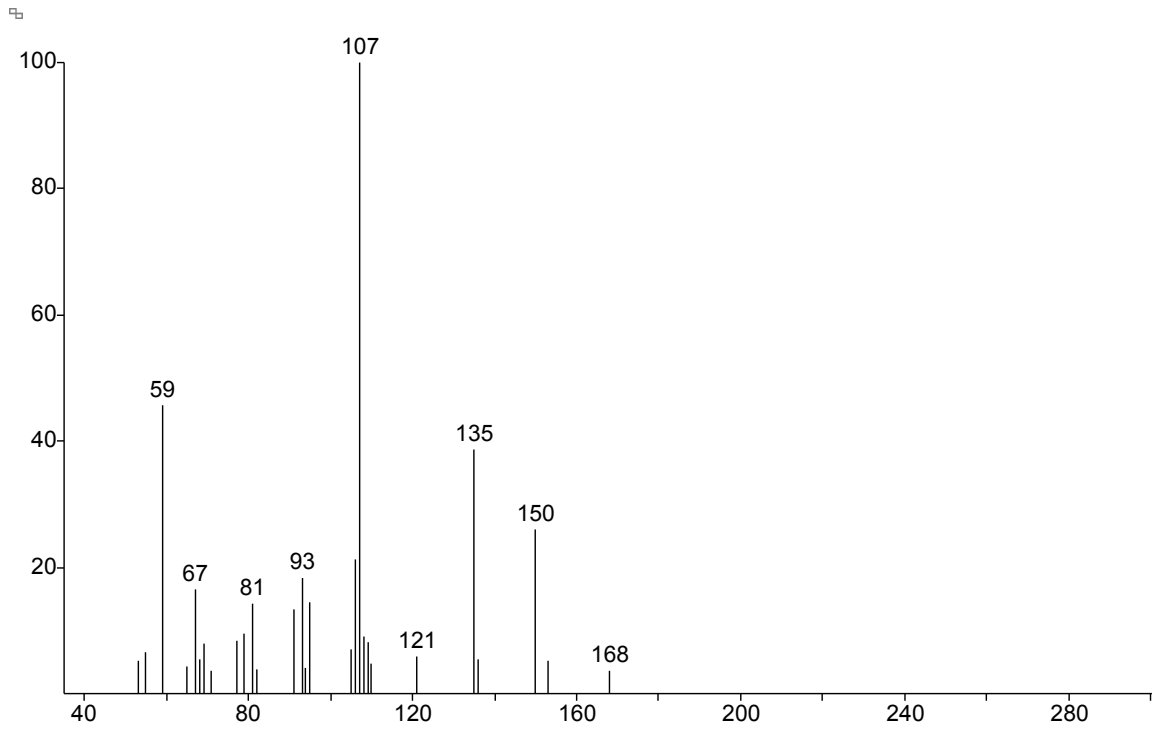

**Figure S10.** Mass spectrum of 2-methyl- $\alpha$ -terpineol (**13**) peak at 11.02 min.

**Table S1.** GC-MS analysis of percent distribution of products from the incubation of Sco7700 with 2-MeNPP (**10**), 2-MeGPP (**3**), and assay buffer alone.

| Incubation             | 2-methyl-2-bornene ( <b>5</b> ) | 1-methyl camphene ( <b>6</b> ) | 2-methylene bornane ( <b>4</b> ) | 2-methyl limonene ( <b>15</b> ) | 2-methyl linalool ( <b>14</b> ) | 2-methyl isoborneol ( <b>1</b> ) | 2-methyl- $\alpha$ -terpineol ( <b>13</b> ) | 2-methyl nerol ( <b>11</b> ) |
|------------------------|---------------------------------|--------------------------------|----------------------------------|---------------------------------|---------------------------------|----------------------------------|---------------------------------------------|------------------------------|
| rt (min)               | 5.07                            | 5.16                           | 5.46                             | 6.41                            | 6.93                            | 6.94                             | 7.70                                        | 7.81                         |
| RI (calc)              | 990                             | 993                            | 1027                             | 1134                            | 1196                            | 1197                             | 1299                                        | 1317                         |
| RI (ref)               | 989                             | 995                            | 1030                             | 1129                            | 1200                            | 1178                             | 1306                                        | --                           |
| 2-MeNPP control chiral | --                              | --                             | --                               | 4 (2/2) <sup>b</sup>            | 10 (5/5) <sup>b</sup>           | --                               | 86 (44/42) <sup>b</sup>                     | --                           |
| 2-MeNPP SCO7700 chiral | <1                              | <1                             | 26                               | 39 (22/17) <sup>ab</sup>        | <1 (0/<1) <sup>ab</sup>         | 17                               | 10 (10/0) <sup>ab</sup>                     | 7                            |
| 2-MeGPP Control chiral | --                              | --                             | --                               | --                              | 100 (49/51)                     | --                               | --                                          | --                           |
| 2-MeGPP SCO7700 chiral | <1                              | <1                             | 10                               | --                              | --                              | 89                               | --                                          | --                           |

<sup>a</sup>percentages after subtraction Mg<sup>2+</sup>-catalyzed background hydrolysis of 2-MeNPP.

<sup>b</sup>total percentage of product formed (percentage first enantiomer to elute/percentage second enantiomer to elute).

## GC-MS spectra of co-injections.

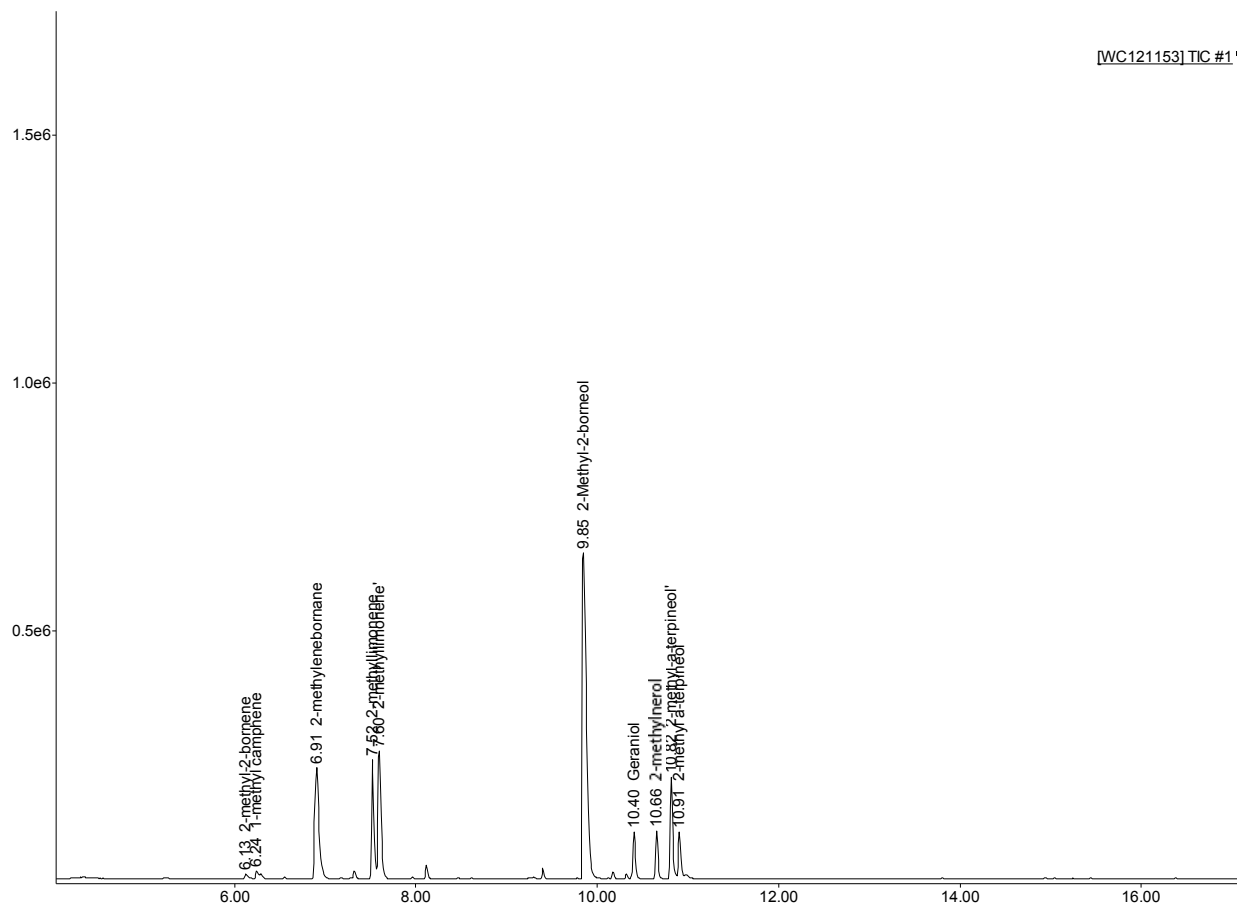

**Figure S11.** GC-MS TIC of the co-injected pentane extracts from the individual incubations of 2-MeNPP (**10**) and 2-MeGPP (**3**) with MIBS.

## GC of the Coinjection

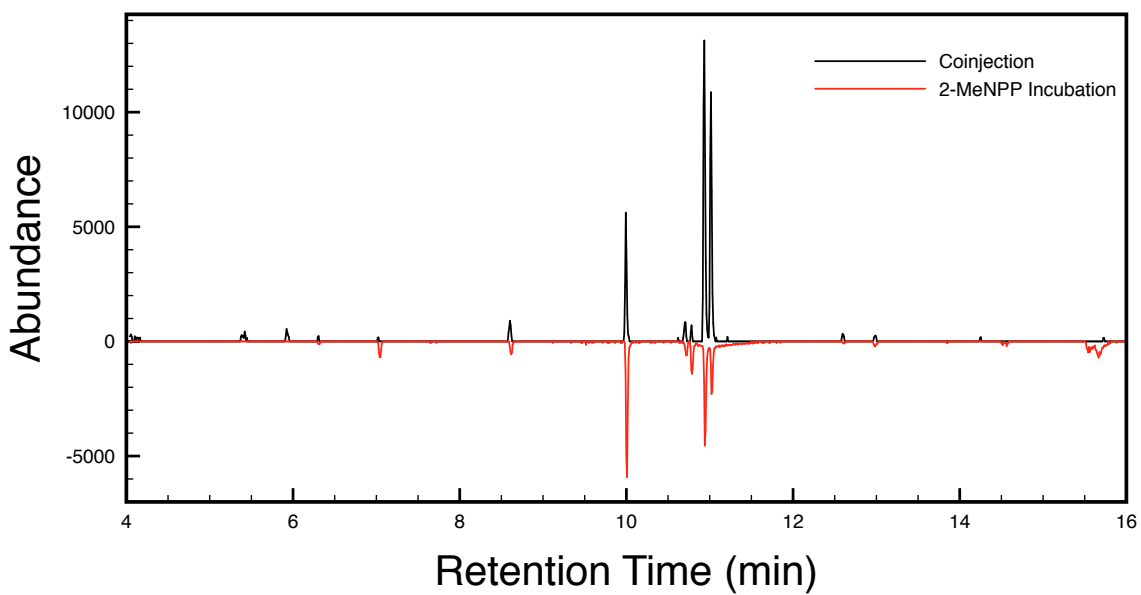

**Figure S12.** Chiral GC-MS TIC of the pentane extract from the incubation of 2-MeNPP with Sco7700 (bottom spectrum) compared to the co-injection of the extract with synthetic 2-methyl- $\alpha$ -terpineol (**13**) (top spectrum).

### Representative GC-mass spectra.

2-methyl-2-bornene

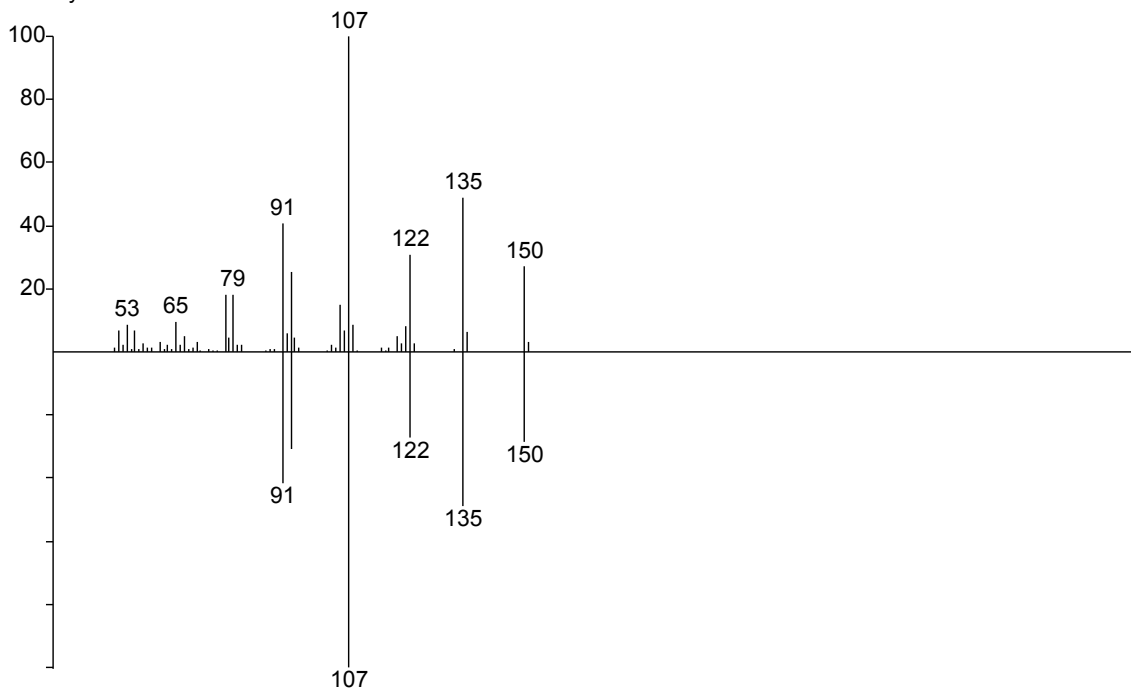

**Figure S13.** Mass spectrum of enzymatically generated 2-methyl-2-bornene (**5**) (lower spectrum) and 2-methyl-2-bornene standard (upper spectrum).

1-methyl camphene

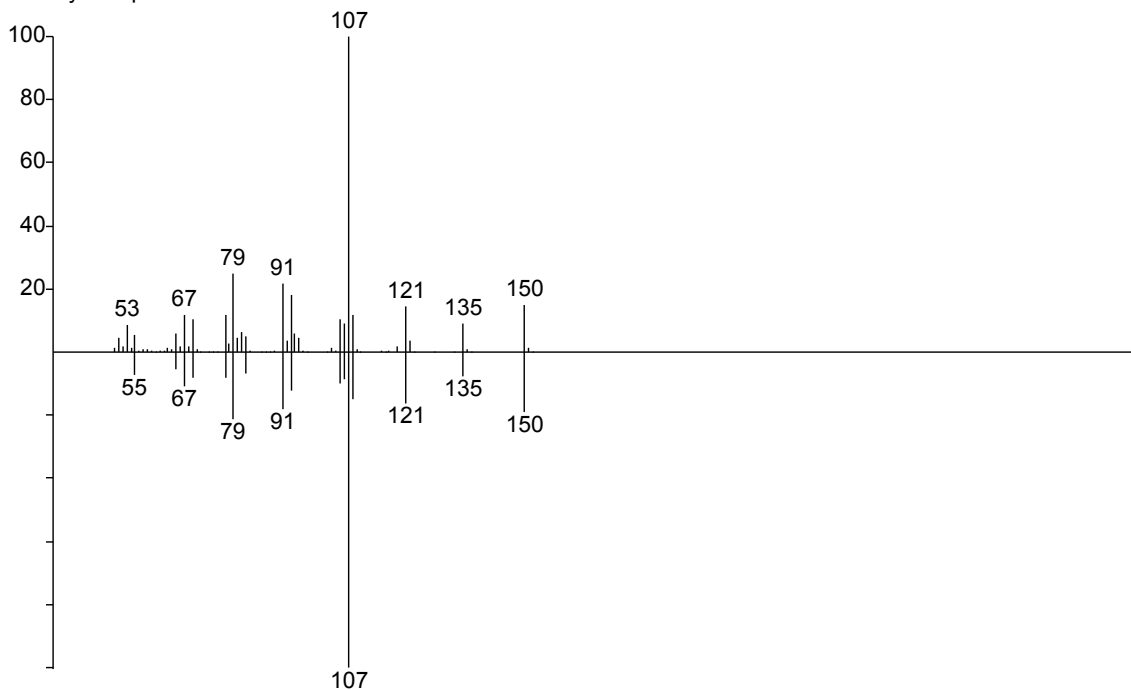

**Figure S14.** Mass spectrum of enzymatically-generated 1-methylcamphene (**6**) (lower spectrum) and 1-methylcamphene standard (upper spectrum).

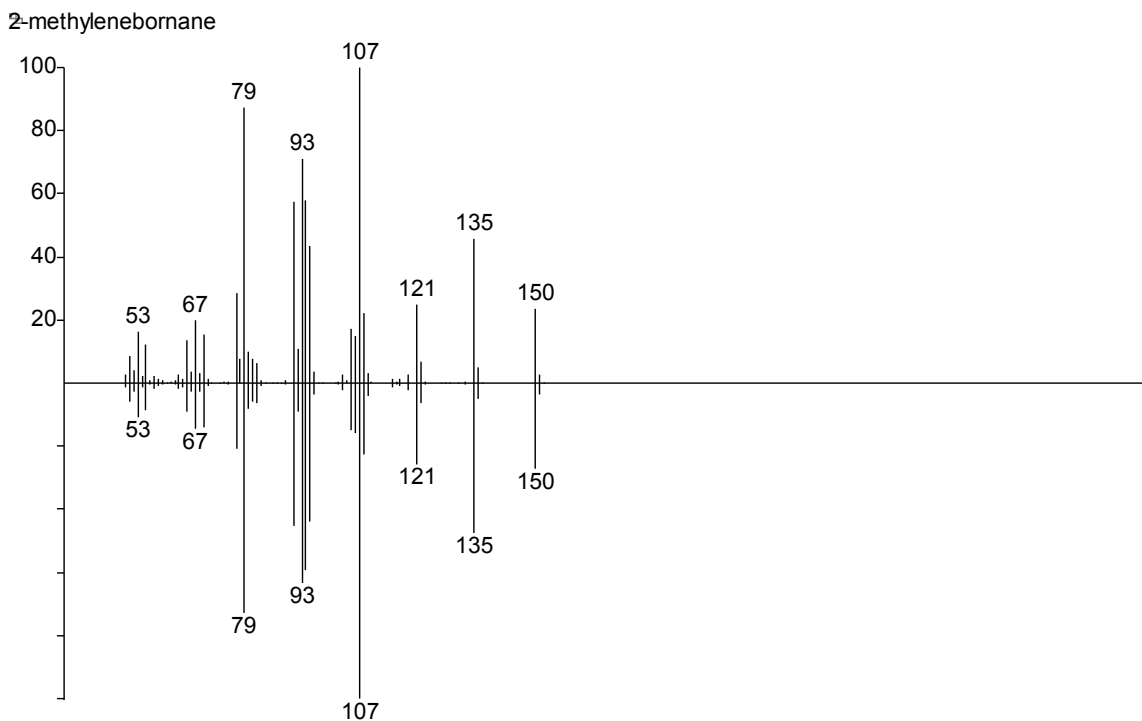

**Figure S15.** Mass spectrum of enzymatically-generated 2-methylenebornane (**4**) (lower spectrum) and 2-methylenebornane standard (upper spectrum).

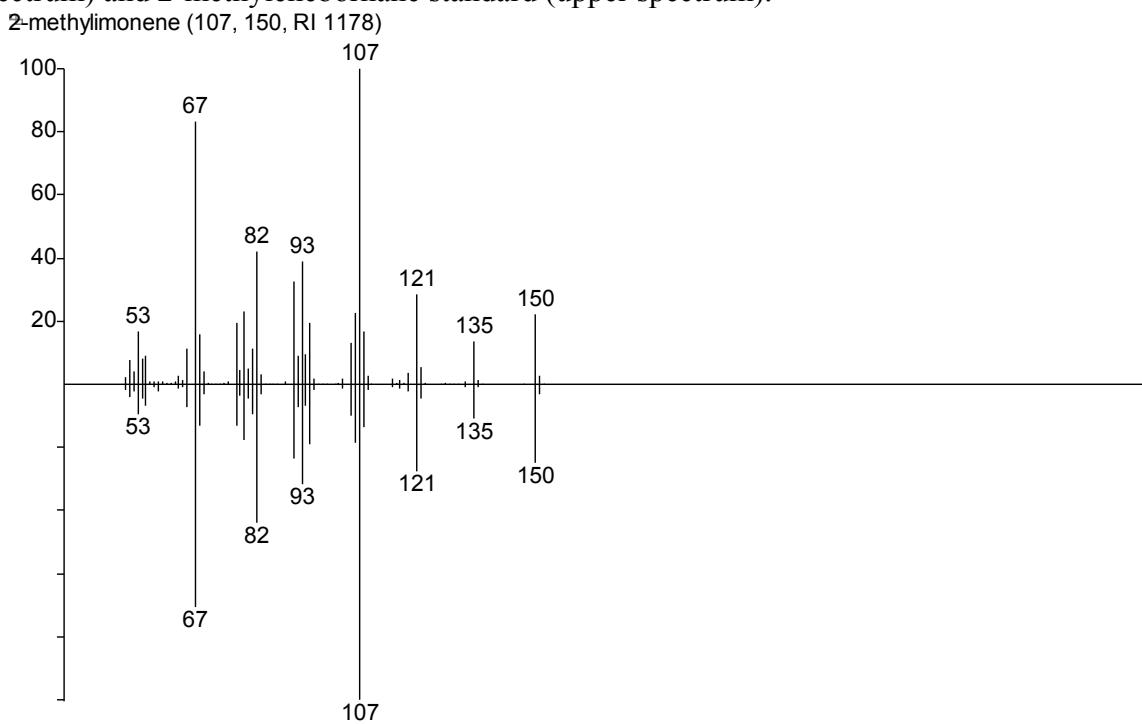

**Figure S16.** Mass spectrum of peak for enzymatically-generated 2-methylimonene (**15**) (lower spectrum) and 2-methylimonene standard (upper spectrum).

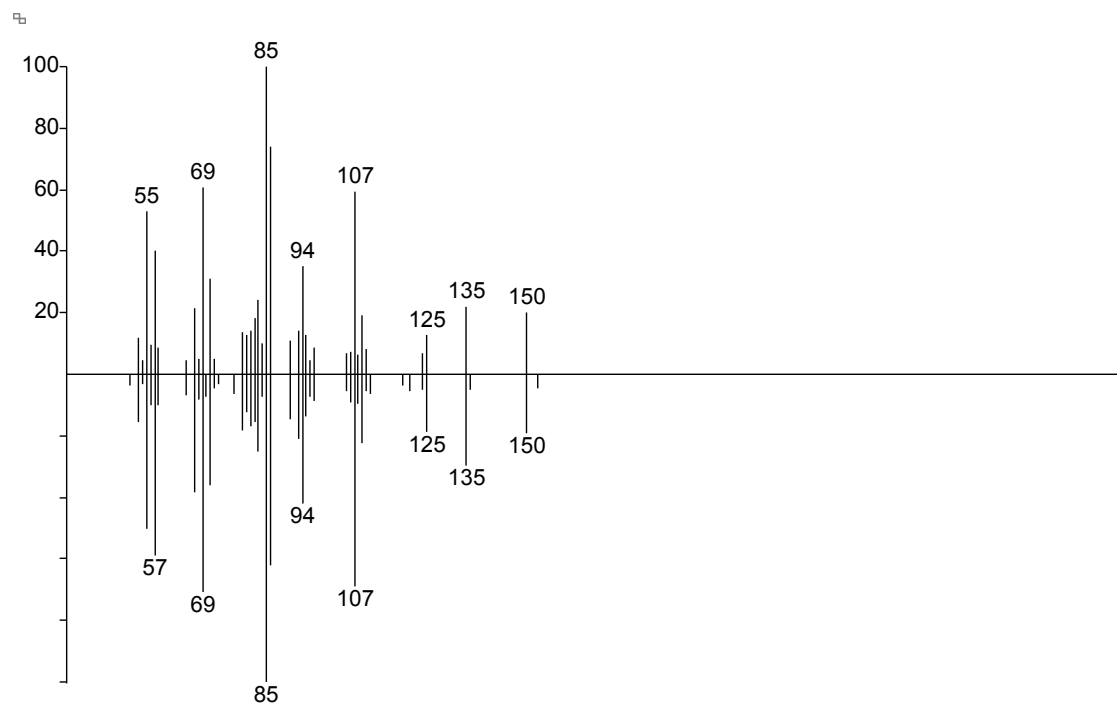

**Figure S17.** Mass spectrum for enzymatically-generated 2-methylinalool (**14**) (lower spectrum) and 2-methylinalool standard (upper spectrum).

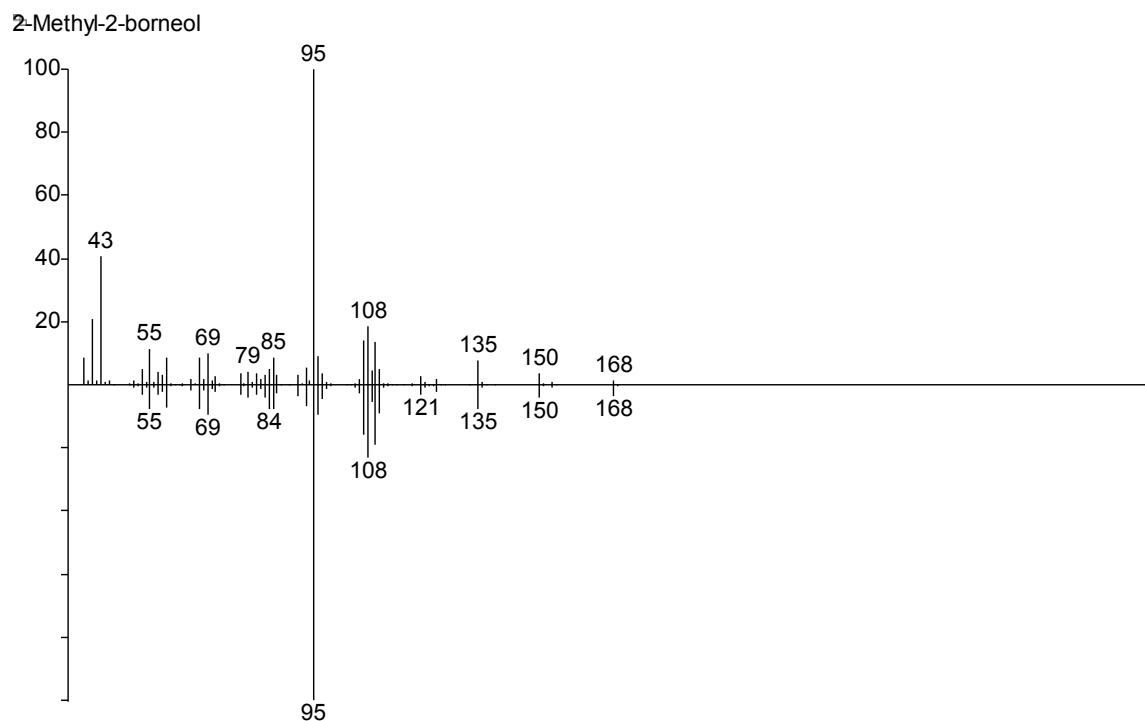

**Figure S18.** Mass spectrum of enzymatically-generated 2-methylisoborneol (**1**) (lower spectrum) and 2-methylisoborneol standard (upper spectrum).



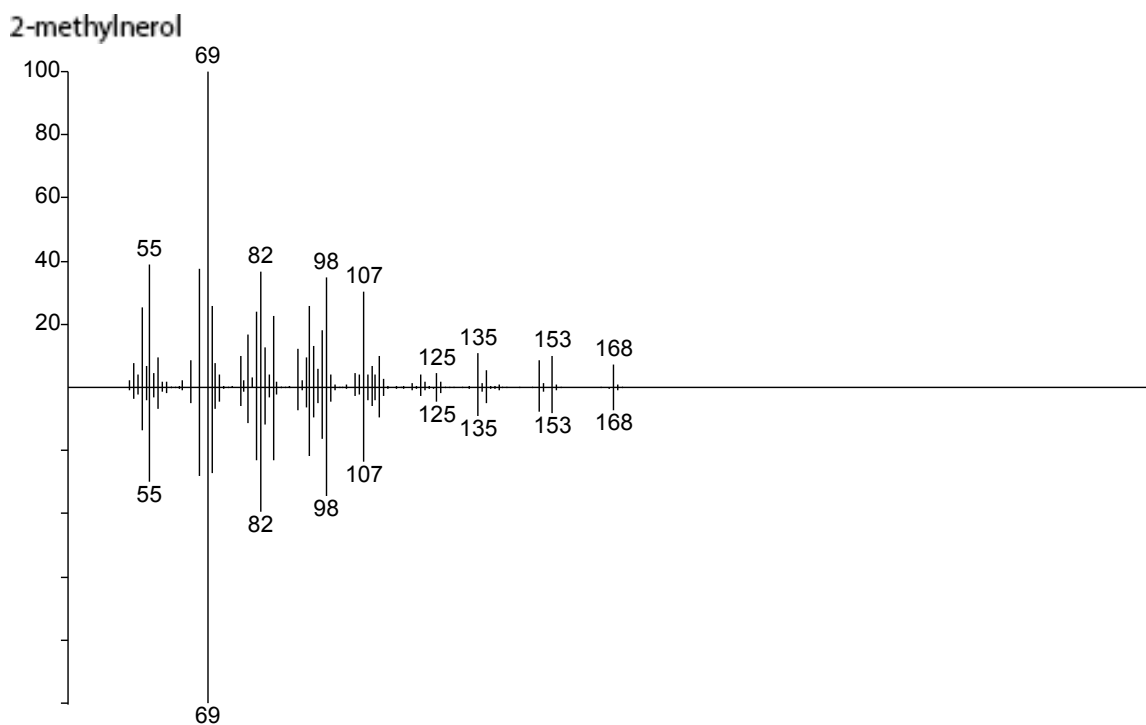

**Figure S19.** Mass spectrum of enzymatically-generated 2-methylnerol (**11**) (lower spectrum) and 2-methylnerol standard (upper spectrum).

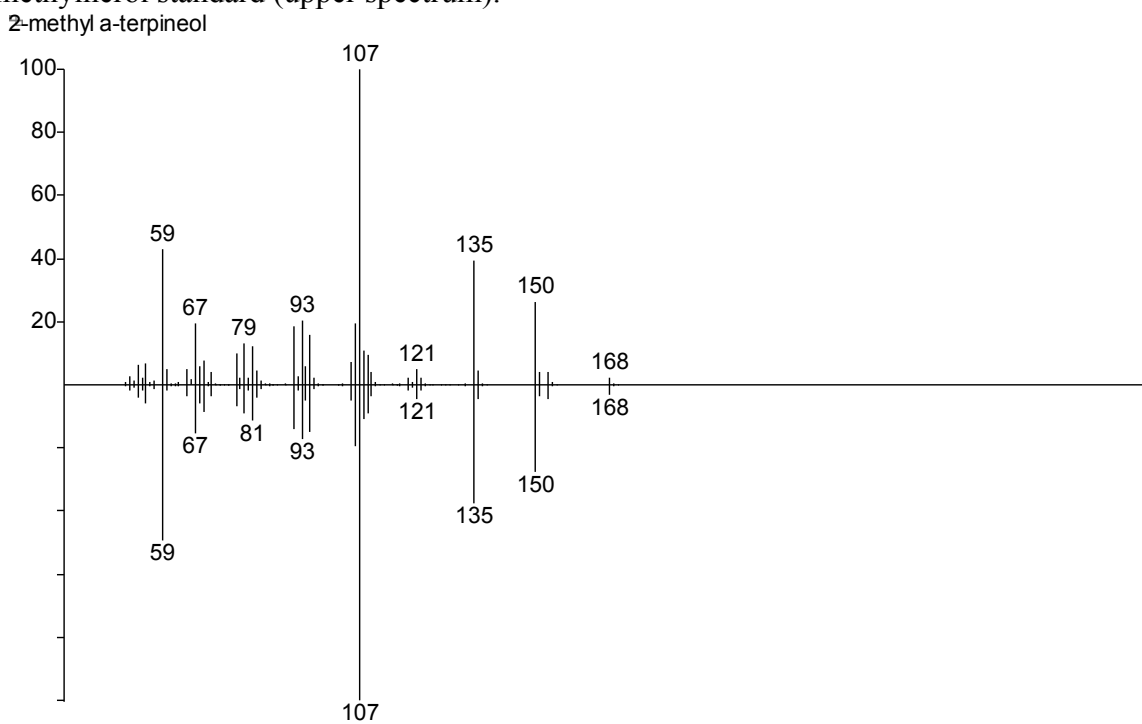

**Figure S20.** Mass spectrum of enzymatically-generated 2-methyl- $\alpha$ -terpineol (**13**) (lower spectrum) and 2-methyl- $\alpha$ -terpineol standard (upper spectrum).

**Steady-state kinetics.**

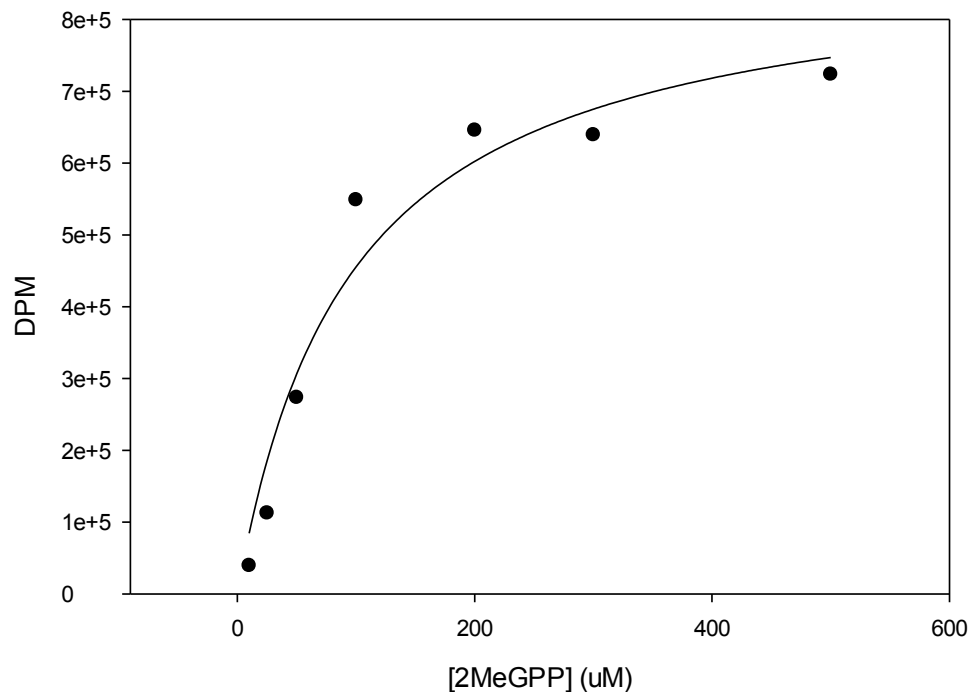

**Figure S21.** Michaelis-Menten plot of the reaction velocity for the MIBS-catalyzed formation of homo-monoterpenes as a function of the concentration of 2-MeGPP (**3**).

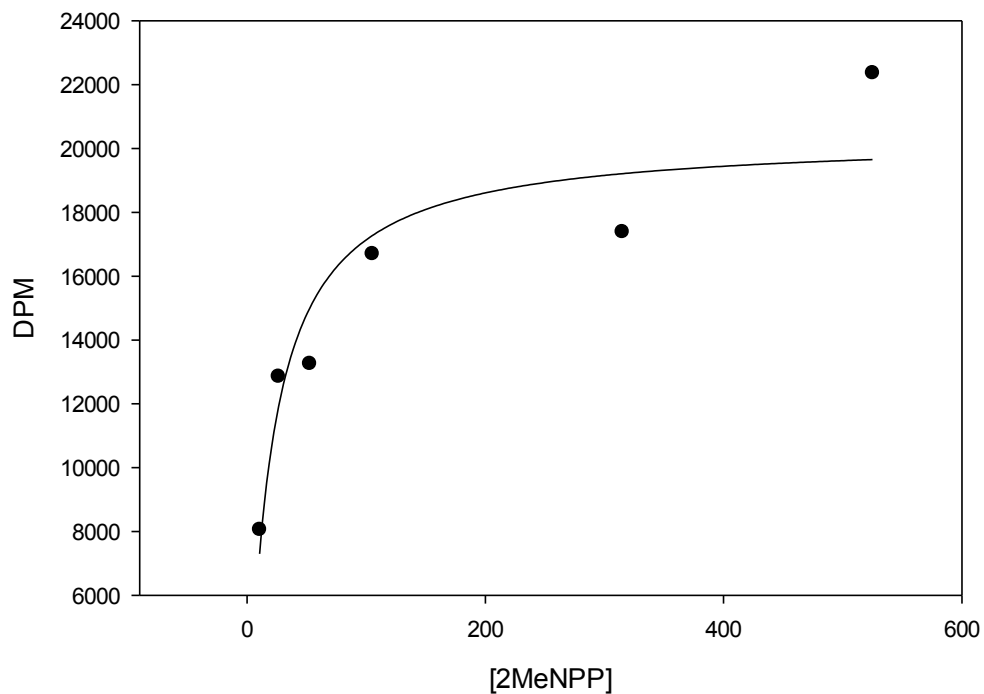

**Figure S22.** Michaelis-Menten plot of the reaction velocity for the MIBS-catalyzed formation of homo-monoterpenes as a function of the concentration of 2-MeNPP (**10**).
